# Supplementary material for: Nucleoside-regulated catalytic activity of copper nanoclusters and their application for mercury ion detection
Source: Royal Society of Chemistry journal article supplement (doi:10.1039/d1nj05525a), 2022-01-01
Supplement: d1nj05525a1.pdf [file d1nj05525a1.pdf]

## Supporting Information

### **Nucleoside-regulated catalytic activity of copper nanoclusters and its application for mercury ions detection**

*Shiyan Li,<sup>‡a</sup> Zihang Zeng,<sup>‡a</sup> Congcong Zhao,<sup>a</sup> Haoyu Wang,<sup>a</sup> Xiaosheng Ye<sup>bc</sup> and*

*Taiping Qing<sup>\*ac</sup>*

<sup>a</sup> College of Environment and Resources, Xiangtan University, Xiangtan 411105, Hunan Province, China

<sup>b</sup> Xiangya School of Public Health, Central South University, Changsha 410078, Hunan, China.

<sup>c</sup>State Key Laboratory of Chemo/Biosensing and Chemometrics, Hunan University, Changsha 410082, China

<sup>‡</sup>These authors contributed equally to this work.

<sup>\*</sup>To whom correspondence should be addressed. E-mail: [taiping\\_qing@163.com](mailto:taiping_qing@163.com)

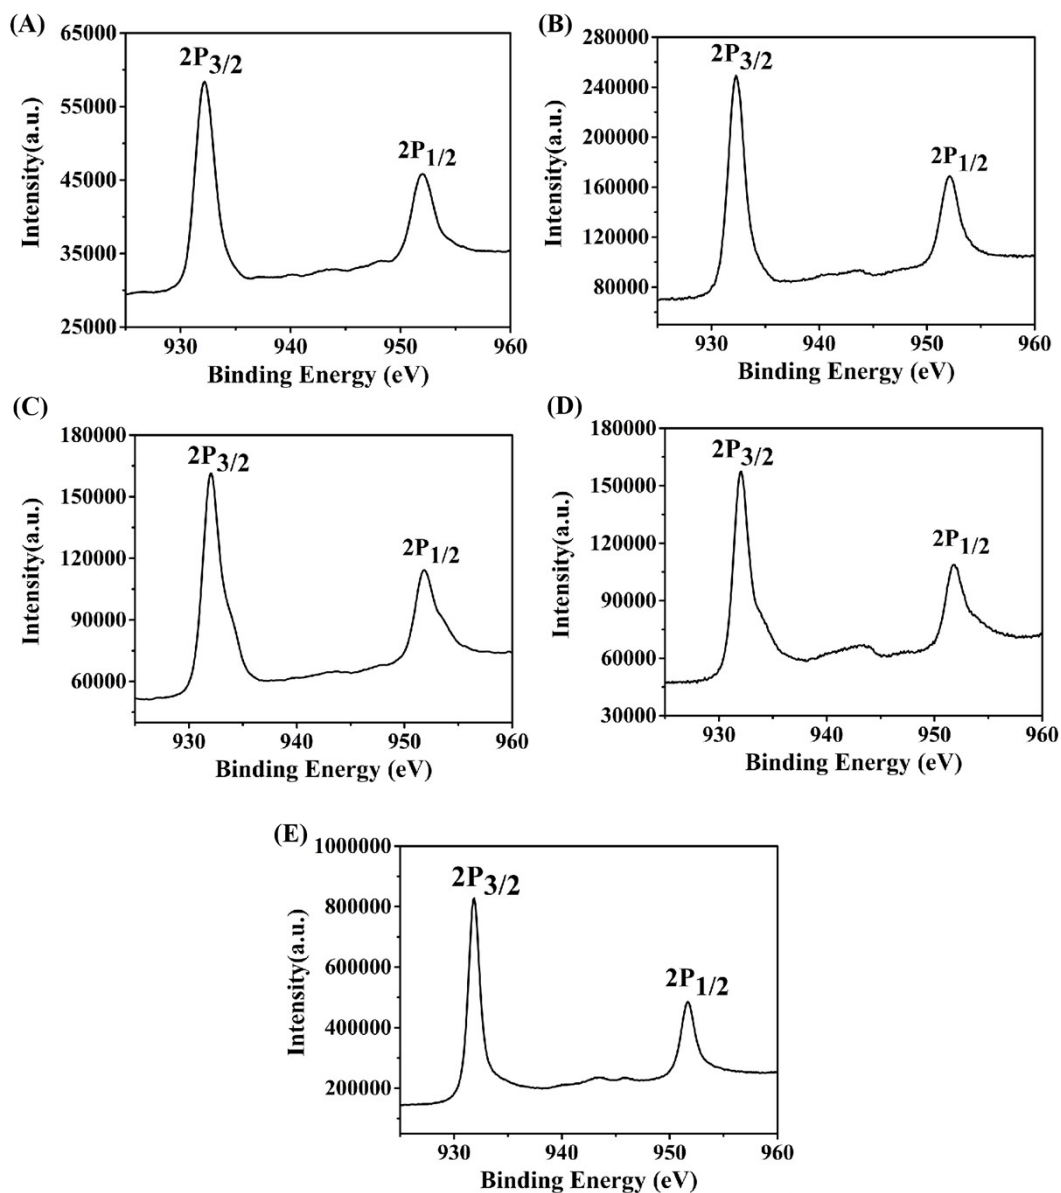

**Fig. S1.** XPS spectra obtained from different copper nanocluster (A-H: A-CuNCs, G-CuNCs, C-CuNCs, T-CuNCs, template free CuNCs), showing the 2p<sub>3/2</sub> and Cu 2p<sub>1/2</sub> peaks at 932.6 and 952.5 eV respectively indicating the presence of Cu(0)/Cu(I) site.

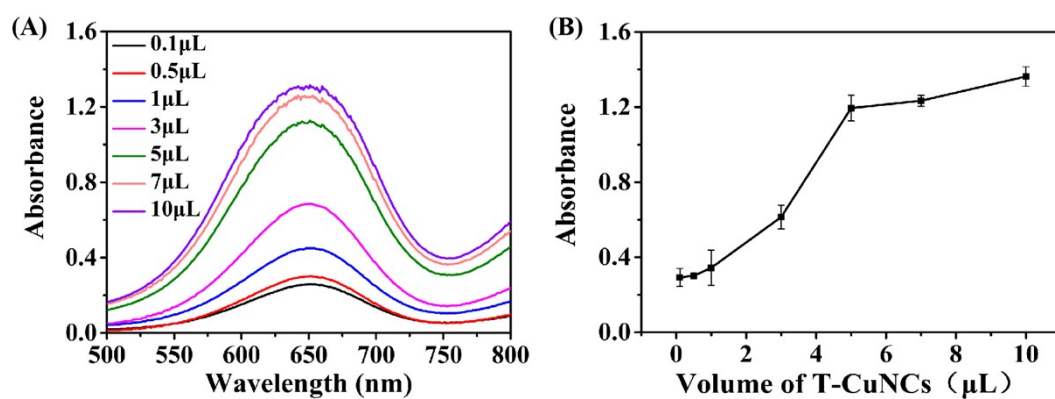

**Fig. S2.** Effect of T-CuNCs volume on the catalytic activity of T-CuNCs; (A) The effect of T-CuNCs volume on ultraviolet absorption spectrum of the catalytic system; (B) The effect of the T-CuNCs volume on the absorbance value of the system at 652nm.

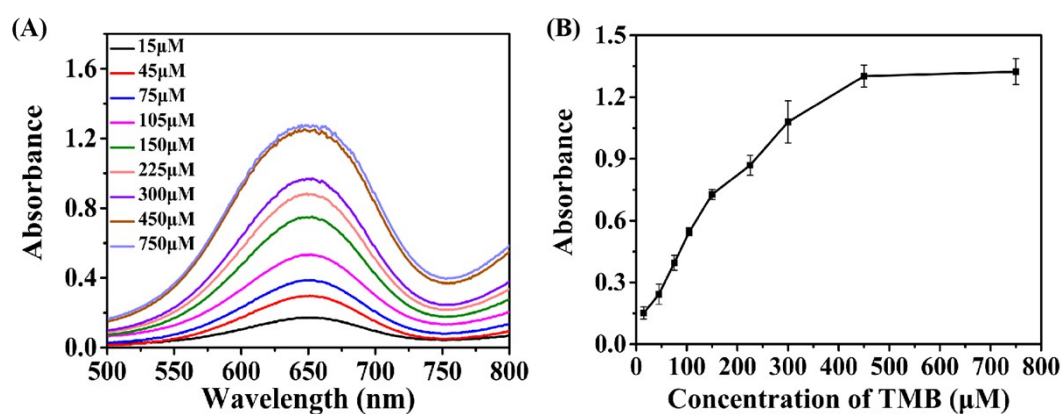

**Fig. S3.** Effect of TMB concentration on the catalytic activity of T-CuNCs; (A) The effect of TMB concentration on ultraviolet absorption spectrum of the catalytic system; (B) The effect of the TMB concentration on the absorbance value of the system at 652nm.

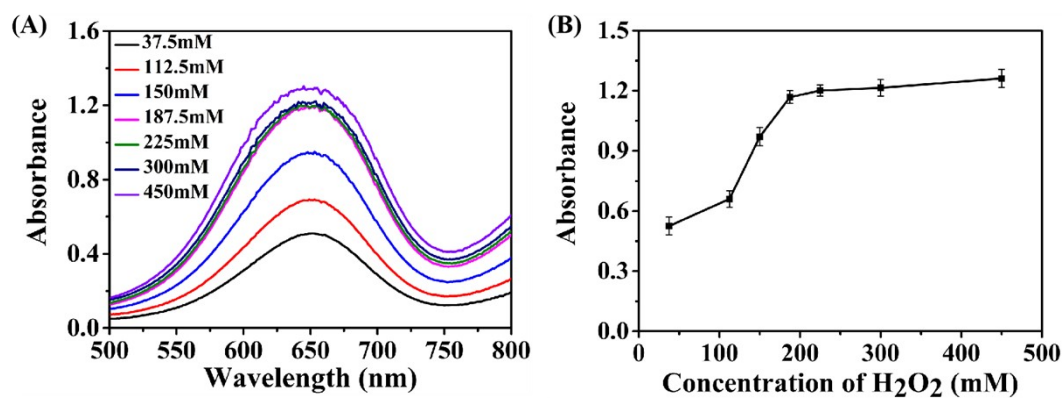

**Fig. S4.** Effect of H<sub>2</sub>O<sub>2</sub> concentration on the catalytic activity of T-CuNCs; (A) The effect of H<sub>2</sub>O<sub>2</sub> concentration on ultraviolet absorption spectrum of the catalytic system; (B) The effect of the H<sub>2</sub>O<sub>2</sub> concentration on the absorbance value of the system at 652nm.

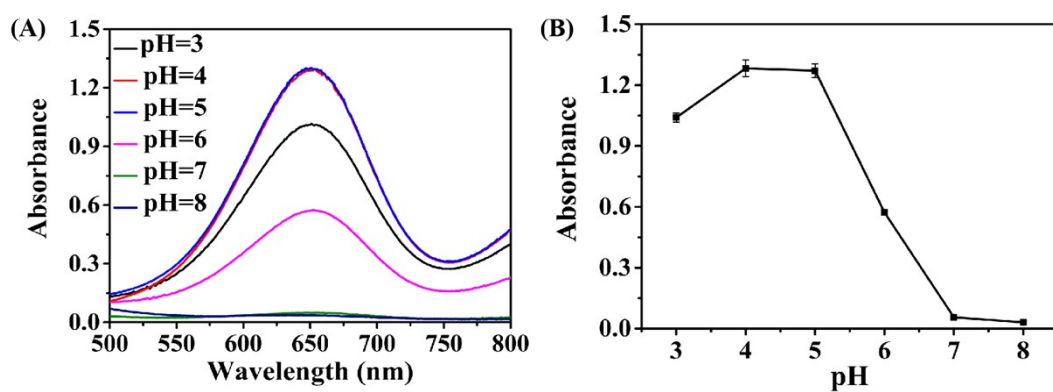

**Fig. S5.** Effect of pH on the catalytic activity of T-CuNCs; (A) The effect of pH on ultraviolet absorption spectrum of the catalytic system; (B) The effect of the pH on the absorbance value of the system at 652nm.

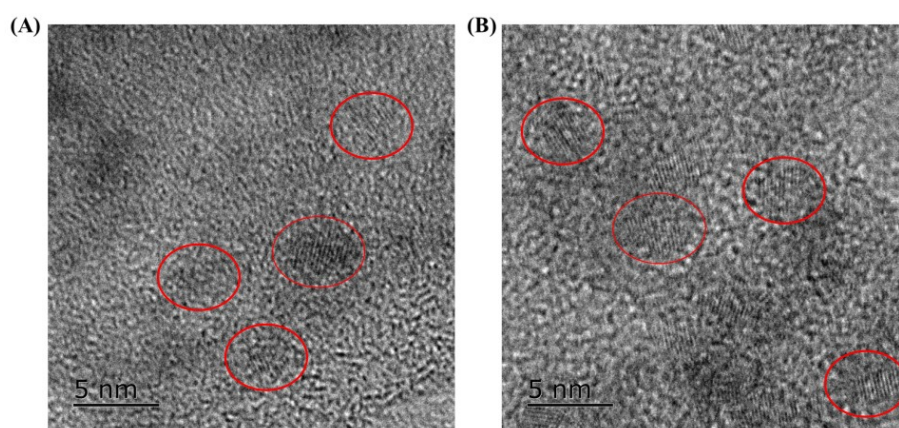

**Fig. S6.** TEM images of the effect of mercury ions on copper nanoclusters, (A) TEM of T-CuNCs; (B) TEM of T-CuNCs after added  $\text{Hg}^{2+}$ .

**Table S1.** Performance comparison of this work with other nanomaterials-based sensors for the detection of Hg<sup>2+</sup>.

| <b>Materials</b>            | <b>Linear range</b>                                | <b>LOD</b>    | <b>Ref.</b> |
|-----------------------------|----------------------------------------------------|---------------|-------------|
| AuNPs                       | 25–750 nM                                          | 50 nM         | 1           |
| AgNPs                       | 10–100 $\mu$ M                                     | 2.2 $\mu$ M   | 2           |
| TPDT-AgNPs                  | /                                                  | 5 $\mu$ M     | 3           |
| TPDT-gold nanorods          | 1–7 $\mu$ M                                        | 0.317 $\mu$ M | 4           |
| DNA-AuNPs                   | 0–5 $\mu$ M                                        | 0.5 $\mu$ M   | 5           |
| MoS <sub>2</sub> nanosheets | 2–200 $\mu$ M                                      | 0.5 $\mu$ M   | 6           |
| SiO <sub>2</sub> /AgNPs     | 0–40 $\mu$ M                                       | 5 $\mu$ M     | 7           |
| Cu@AuNPs                    | 10–500 nM,<br>500–2500 nM                          | 10 nM         | 8           |
| MT-CuNCs                    | 97 nM–2.325 $\mu$ M,<br>3.10 $\mu$ M–15.59 $\mu$ M | 43.8 nM       | 9           |
| DNA-silica nanoparticles    | 0–500 nM                                           | 20 nM         | 10          |
| CuNCs                       | 0–350 $\mu$ M                                      | 11.67 $\mu$ M | This work   |



## Reference

1. G.H. Chen, W.Y. Chen, Y.C. Yen, C.W. Wang, H.T. Chang, C.F. Chen, *Anal. Chem.*, 2014, **86**, 6843-6849.
2. K. Farhadia, M. Forougha, R. Molaeia, S. Hajizadeha, A. Rafipourb, *Sens. Actuators B Chem.*, 2012, **161**, 880-885.
3. P. Rameshkumar, P. Viswanathan, R. Ramaraj, *Sens. Actuators B Chem.*, 2014, **202**, 1070-1077,
4. S. Jayabal, R. Sathiyamurthi, R. Ramaraj, *J. Mater. Chem. A*, 2014, **2**, 8918-8925.
5. X. Xu, J. Wang, K. Jiao, X. Yang, *Biosens. Bioelectron.*, 2009, **10**, 3153-3158.
6. Y. Lu, J. Yu, W.C. Ye, Y. Xin, P.P. Zhou, H.X. Zhang, *Microchim. Acta*, 2016, **183**, 2481-2489.
7. P. Rameshkumar ,S. Manivannan ,R. Ramaraj, *J. Nanopart. Res.*, 2013, **15**, 1639-1647.
8. Y. Zhao, H. Qiang, Z.B. Chen, *Microchim. Acta*, 2017, **184**, 107-115.
9. R. Liu, L. Zuo, X. Huang, S. Liu, G. Yang, S. Li, C. Lv, *Microchim. Acta*, 2019, **186**, 250.
10. Y.F. Zhang, Q. Yuan, T. Chen, X.B. Zhang, Y. Chen, W.H. Tan, *Anal. Chem.*, 2012, **84**, 1956-1962.
